1        **Phenotypic robustness determines genetic regulation of complex traits**

2

3

4                    **Anupama Yadav, Kaustubh Dhole, Himanshu Sinha\***

5

6                    Department of Biological Sciences, Tata Institute of Fundamental Research,

7                                    Mumbai, 400005, India

8

9

10    \*Corresponding author: [hsinha@tifr.res.in](mailto:hsinha@tifr.res.in)

11

12

13    **Keywords:** phenotypic robustness, canalization, variance QTL, gene-environment  
14    interaction, gene-gene interaction, cryptic genetic variation

15

16

17

18

## 19 **ABSTRACT**

20 A balance between phenotypic variability and robustness is crucial for populations to adapt to  
21 multiple selection pressures. The plasticity of genetic pathways underlies this balance. We  
22 investigated this plasticity by studying the regulation of phenotypic mean and variance in a  
23 biparental recombinant population of *Saccharomyces cerevisiae* grown in a variety of  
24 environments. We found that the growth of this population was well buffered in most  
25 environments, such that majority of alleles regulated the mean value of phenotype, and only a  
26 subset of these alleles regulated phenotypic variance. This latter class of alleles allowed the  
27 other genetic variants to express a range of phenotypic values around a shifted mean. This  
28 shift depends on the population and the environment, *i.e.* based on the evolutionary history of  
29 a strain, buffering can result in either a superior or an inferior phenotype in an environment  
30 but never both. Interestingly, intricate coupling of the genetic network regulating mean  
31 phenotype and robustness was observed in a few environments, which highlighted the  
32 importance of phenotypic buffering in layout of the genetic architecture. For loci regulating  
33 variance, show a higher tendency of genetic interactions, which not only establishes a genetic  
34 basis of release of variance, but also emphasizes the importance of mapping robustness in  
35 understanding the network topology of complex traits. Our study demonstrates differential  
36 robustness as one of the central mechanisms regulating variation in populations and  
37 underlines its role in identifying missing heritability in complex phenotypes and diseases.

38

39

## 40 **INTRODUCTION**

41 The effect of genetic variation can either remain dormant or manifest itself phenotypically, a  
42 phenomenon referred to as phenotypic capacitance (Masel and Siegal 2009; Félix and  
43 Barkoulas 2015; Hayden *et al.* 2015). The process of revelation of phenotypic variability  
44 (decanalization) has adaptive potential for populations in novel or stressful environments  
45 (Masel 2013). Released mutations, often referred to as cryptic genetic variability (CGV)  
46 (Paaby and Rockman 2014) can exhibit high phenotypic variability across multiple  
47 environments, which provides adaptive diversity (Chevin *et al.* 2010; Geiler-Samerotte *et al.*  
48 2013). Understanding the processes underlying phenotypic capacitance is important for  
49 interpreting evolutionary effects of forces acting on populations, which result in missing  
50 heritability and incomplete penetrance of complex traits and disease. Such processes may  
51 ultimately govern the origin and development of complex genetic and molecular networks  
52 (Siegal and Leu 2014).

53

54 Recent advances in systems biology have revealed that interpreting molecular mechanisms of  
55 evolution is the key in understanding the highly interconnected genetic map (Wagner *et al.*  
56 2007; Costanzo *et al.* 2010). Certain genes, called hubs, show higher connectivity than others  
57 and thus holding the network together (Vidal *et al.* 2011). Deciphering the mechanisms, by  
58 which these network hubs modulate the effector genes in an environment- and genetic-  
59 background dependent manner to influence the phenotype, is the key to understanding how  
60 phenotypic capacitance and variability have created the genotype-phenotype (GP) map.

61

62 Despite being proposed over half a century ago (Jamniczky *et al.* 2010), only recently, a few  
63 studies have begun to identify possible regulators that buffer this genetic diversity (Félix and  
64 Barkoulas 2015). Evidence from various genome-wide deletion, protein-protein and  
65 transcriptional network analyses have proposed chromatin regulators as network hubs  
66 regulating phenotypic capacitance and variability (Levy and Siegal 2008; Tirosh *et al.* 2010).  
67 However, the molecular mechanisms through which these networks mediate the variability in  
68 the effector genes and generate diverse phenotypic responses are largely unknown. To date,  
69 the mechanistic bases have been identified only in a few cases, *e.g.* Hsp90, a highly  
70 conserved protein that regulates the phenotypic variance through altered protein folding  
71 (Rutherford and Lindquist 1998; Queitsch *et al.* 2002).

72

73 In this study, we have attempted to address the following two questions. How important is  
74 regulation of robustness for genetic regulation of the phenotype? And, whether perturbation  
75 of this robustness and the subsequent release of CGV are beneficial or detrimental for the  
76 population growth?

77

78 In order to understand the regulation of phenotypic variability and plasticity, it is necessary to  
79 investigate the effect of regulators on diverse mutations, an approach applied so far to only a  
80 few genes (Queitsch *et al.* 2012). For a single species, though not achievable through single  
81 gene perturbation studies, recombinant populations analyzed in various environments provide  
82 an excellent platform to study such effects (Lempe *et al.* 2013). The allelic variants that  
83 mediate how phenotypes are regulated have two potential outcomes. First, there is an effect  
84 on the ‘mean’ value of some readout, such as growth in different environments in the case of  
85 yeast. Mapping such an effect on population ‘mean’ values allows the identification of alleles  
86 that affect phenotypes independent of the genetic background. In addition, there is a second

87 consequence, *i.e.* an effect on the ‘variance’ of the readout (Hall *et al.* 2007; Lee *et al.* 2014),  
88 which is often ignored in many studies. Alleles that cause such differences in population  
89 ‘variance’ have a more subtle effect, whereby genetic diversity is retained in the population  
90 (Figure 1A). In our study, we used a synthesis of both these mapping approaches to discern  
91 patterns of regulation of variation in a recombinant population. We find that the genetic loci,  
92 and their networks, regulating robustness are a subset of the conventionally studied loci,  
93 which affect phenotypic mean. However, in certain environments, based on the evolutionary  
94 history of the parental strains, these two networks are very closely intertwined as  
95 demonstrated by complete loss of buffering in the recombinants. Such environments highlight  
96 the importance of mechanisms regulating robustness in the genetic architecture. Based on our  
97 analysis, we propose differential robustness of alleles as a major contributor to antagonistic  
98 pleiotropy. Finally, we provide evidence for genetic basis of loss of robustness and therefore  
99 propose variance mapping as a methodology to uncover the genetic interactions regulating  
100 complex traits.

101

102

## 103 **RESULTS**

### 104 **High overlap between mean and variance QTL**

105 Using a recombinant population generated from a biparental cross, we carried out linkage  
106 mapping to identify genetic loci regulating both phenotypic mean (QTL) and phenotypic  
107 robustness (variance QTL or vQTL) of colony size variation across 34 diverse environments  
108 ranging from different carbon sources to oxidative and DNA damaging stress (see Methods).  
109 To compare the genetic loci identified by QTL and vQTL mapping, the genome was binned  
110 into 595 bins (see Methods, Tables S1, S2). The distribution of loci showing a difference in  
111 mean only, variance (robustness) only or both, differed across environments (Figure 1B). The  
112 majority of all loci identified affected only mean (70%) with 4% affecting only robustness.  
113 However, a substantial 27% loci were both QTL + vQTL (Figure 1C). For these loci,  
114 pleiotropic hotspots were identified, which regulated mean, robustness or both across  
115 multiple environments (Table S2).

116

### 117 **Environment dependent regulation of phenotypic mean and robustness**

118 While there was no association between number of QTL and vQTL identified across  
119 environments, there was a negative correlation ( $r^2 = -0.4$ ) between the number of QTL and  
120 the number of loci which were both QTL + vQTL associated across environments. This

121 indicated that there is a decrease in the number of loci with independent effects as the number  
122 of loci regulating variance increase. Based on the overlap between mean and variance loci,  
123 we could divide the environments into three categories – (i) No overlap between QTL and  
124 vQTL: this indicated that growth was tightly buffered in the recombinants and while the  
125 genetic variants affected the mean of the phenotype, robustness was maintained. These  
126 environments were enriched in various carbon sources. (ii) Partial overlap between QTL and  
127 vQTL: some loci showed difference in robustness but the majority affected only the mean.  
128 (iii) Almost complete overlap: in these environments, all loci which affected the phenotypic  
129 mean resulted in varying degrees of loss of robustness. In such environments only two states  
130 were possible, *i.e.* either the allele contributed to the buffered state or it resulted in loss of  
131 robustness. Growth in such environments emphasized the role of robustness in regulating  
132 phenotypic variation.

133

#### 134 **Release of phenotypic variance is directional**

135 A high overlap of regulation of mean and robustness indicated that the loci regulating  
136 phenotypic variability were a subset of the loci that have been implicated to be associated  
137 with a shift in the mean upon release of variation. While pleiotropic hotspots regulated the  
138 mean and the variance across multiple environments, no discernible pattern was observed in  
139 the directionality of this effect, except when considering each environment independently  
140 (Figure 2A). In the majority of environments (26/33), we observed a strong correlation  
141 between the effect of the allele on the mean and the variance for the significant loci. One half  
142 of the environments (13/26) showed a strong positive correlation ( $r^2 > +0.5$ ) indicating that  
143 loss of robustness was, on an average, advantageous, and the other half showed a negative  
144 correlation ( $r^2 < -0.5$ ), *i.e.* loss of robustness was detrimental for the population (Figure 2B).

145

#### 146 **Differential regulation of robustness as a major contributor to gene-environment** 147 **interaction**

148 Pleiotropic loci often have antagonistic mean effects across environments (Yadav *et al.*  
149 2015). While loci regulating robustness show high environment specificity, we asked if it is  
150 possible for a locus to result in robustness in one environment and decanalization in the other  
151 by comparing covariance of alleles across environmental pairs (Haber and Dworkin 2015).  
152 Forty seven bins were identified that had a significant effect in two or more environments.  
153 Eighteen hotspots showed significant difference in the covariance with 10 being significant  
154 across multiple pairs of environments (Table S3). Unlike mean effects, high consistency was

155 observed in allelic robustness of a single hotspot across environmental pairs, *i.e.* within a  
156 hotspot the same allele showed a low covariance (high buffering or canalized) across multiple  
157 environmental pairs and consequently the other allele consistently showed a high covariance  
158 (decanalization). This consistency in buffering, when coupled with high environment  
159 specificity of directionality (advantageous or detrimental but not both) of release of  
160 variance, explains the abundant antagonistic pleiotropy observed in mean effects of these  
161 pleiotropic hotspots (Figure S1) (Yadav *et al.* 2015). As suggested by our previous analysis,  
162 the environment would determine whether the accumulated mutations would be beneficial or  
163 detrimental to the phenotype. In conclusion, this covariance analysis shows that differential  
164 regulation of robustness is a major contributor to gene-environment interactions, especially  
165 antagonistic pleiotropy.

166

### 167 **Release of variance is genetic in nature**

168 While most of the polymorphisms in this population were neutral, some showed their direct  
169 effects and others were hidden showing their effects only under certain environmental and  
170 genetic perturbations. To estimate the extent of genetic basis of loss of robustness, two-QTL  
171 interaction mapping was performed by considering the effects of only significant QTL and  
172 vQTL loci (see Methods). Amongst the loci showing two-QTL interactions, 10% had only  
173 single QTL effects, whereas 80% were either vQTL or both (Table S4) indicating that vQTL  
174 were involved in a greater fraction of genetic interactions. These interacting loci showed  
175 stronger effects in the decanalized allele than the buffered one (Figure 3B, 3C). In addition to  
176 showing that there is a genetic basis regulating the increase in variability, this observation  
177 also suggests that altered variance is a good predictor of extent of genetic interactions.

178

179 In our analysis, two kinds of interaction hubs were identified: *within environment interaction*  
180 *hubs*, where a locus interacted with multiple loci to regulate phenotypic variation in a given  
181 environment; and *across environment interaction hubs*, where a pleiotropic locus interacted  
182 with different loci across several environments to regulate phenotypic variation (Figure 4A).  
183 Overall, our observations support a modular structure of regulation of phenotypic robustness.  
184 In *within environment hubs*, some regulators controlled multiple effector genes in a single  
185 environment. In the presence of a decanalized allele, this control is disrupted, resulting in a  
186 high variance in the same environment. These hubs were identified in the environments  
187 where most loci independently regulated both mean and robustness. On the other hand, in  
188 *across environment hubs*, a different set of effectors functionally regulated the phenotype

189 across distinct environments. This suggests that allelic variations in such hubs will cause  
190 changes in variability and control growth across environments.

191

## 192 **Network of loci regulate phenotypic buffering**

193 Studies showing high interconnectivity and redundancy in the genetic networks argue for a  
194 crosstalk among multiple regulators of phenotypic robustness (Kafri *et al.* 2009; Li *et al.*  
195 2010; Costanzo *et al.* 2010). At a population level, this would translate to maintenance of  
196 robustness by a network of loci instead of a single locus. To identify such interactions  
197 regulating phenotypic variance, we carried out a two-vQTL interaction mapping using  
198 candidate loci (Table S4). To our knowledge, this is the first time that such an analysis has  
199 been performed. A large number of two-vQTL interactions were identified, many more than  
200 would be expected from proportion of single vQTL analysis, emphasizing the functional  
201 relevance of co-regulating variance in population dynamics (Figure 4B). Interestingly, in  
202 addition to just the differential regulation of variance, this interaction mapping also identified  
203 two-locus pairs which had buffered variance in 3 out of their 4 allelic combinations (Figure  
204 3E, 3F). Indeed, in environments showing high overlap between mean and variance QTL,  
205 multiple such pairs were identified (Figure 4C, 4D), indicating that there was a highly  
206 connected, redundant multi-locus network that maintained phenotypic robustness. We also  
207 observed that it is only under very specific allelic combinations that this network was  
208 disrupted to reveal phenotypic variance.

209

210

## 211 **DISCUSSION**

212 Populations balance maintaining a robust phenotype unaffected by genetic perturbation and  
213 active accumulation of mutations as potential for evolution. Therefore, it is a reasonable  
214 assumption that regulation and mediation of phenotypic variability under different selection  
215 pressures plays a significant role in determining the networks governing complex traits  
216 (Landry and Rifkin 2010; Geiler-Samerotte *et al.* 2013).

217

218 Once a population adapts to a particular environment, stabilizing selection acts to maintain  
219 the mean at a specific fitness value. While phenotypically uniform, the population needs to  
220 maintain genetic diversity to maintain adaptive potential in the face of a change in selection  
221 pressure (Hartman *et al.* 2001; Gibson and Dworkin 2004). This requires the presence of  
222 genetic hubs that may sense environmental or genetic perturbations, transducing their

223 responses to the downstream effectors, and therefore, regulate the release of phenotypic  
224 capacitance (Figure 5) (Carlborg *et al.* 2006; Le Rouzic and Carlborg 2008; Hayden *et al.*  
225 2015). This release of phenotypic diversity can be a result of encountering a novel or a stress  
226 environment as well as a result of a change in a regulator (Figure 5) (McGuigan and Sgrò  
227 2009).

228

229 Our study showed that high-resolution QTL mapping could be used to distinguish between  
230 genetic loci which have a ‘mean’ effect on the phenotype and those which regulate  
231 phenotypic robustness. While various studies have compared loci regulating mean and  
232 variance in different organisms in the past they were limited either by sample size or range of  
233 phenotypes considered, thus showing varying degrees of overlap between loci regulating  
234 mean and variance (Hall *et al.* 2007; Sangster *et al.* 2008; Lee *et al.* 2014). Our study shows  
235 empirical evidence that regulation of robustness forms the basis of genetic networks  
236 regulating a phenotype. Growth in an environment can be regulated in two ways: either most  
237 of the loci affect the mean with only a subset affecting robustness, or almost all loci affect  
238 both robustness and the mean. In addition to the nature of the environment, this  
239 categorization would depend on the evolutionary history of the parental strains.

240

241 In our study, presence of majority of alleles differentially affected the phenotype mean  
242 without perturbing the buffered state, indicates that the network maintaining robustness is  
243 extensive and the genetic variation in the population is not sufficient to perturb it.  
244 Alternatively, for the environments which parental strains would have encountered during  
245 evolution and were similarly adapted to, *viz.*, various carbon sources, diverse parental alleles  
246 maintain similar robust state. On the other hand, in a few environments, all alleles that  
247 affected mean also affected robustness. This high coupling indicated that robustness was  
248 perturbed in the segregating population such that every allele that affected the phenotype also  
249 perturbed its robustness. This could be possible if either one of the strains was not exposed to  
250 the environment during its evolution or the strains were buffered through incompatible  
251 independent mechanisms. In such environments, the network topology and role of robustness  
252 in their layout becomes apparent.

253

254 Independent of the kind of environment, strong directionality was observed in the release of  
255 cryptic genetic variation. This directionality is likely the frozen-in result of the evolutionary  
256 history of the strains or the phenotype (Taute *et al.* 2014). For a stabilized population in a



257 stressful or a novel environment, the population has an evolutionary imperative to release  
258 phenotypic variability, resulting in a positive association between the mean and the variance  
259 (Le Rouzic and Carlborg 2008; McGuigan and Sgrò 2009). On the other hand, in an adapted  
260 environment, release of variability will be detrimental and would be visible as a negative  
261 association between the mean and the variance (see Figure 2A). We observed that while  
262 genetic loci showed antagonism in their mean effects across environments, they showed high  
263 consistency in directionality of their buffering abilities. Environment-dependent effect of  
264 release of variance as well as high consistency in buffering indicates that a locus that buffers  
265 the phenotypic capacitance will, as a result, have an antagonistic effect on the population  
266 mean in an environment-dependent manner. Additionally, this consistency of effect on  
267 robustness is in accordance with the known molecular mechanisms. An allele that perturbs  
268 protein folding or chromatin silencing (Taylor and Ehrenreich 2015) will show similar  
269 molecular behaviour across environments, whether the release will be beneficial or  
270 detrimental will be determined by the phenotype. In summary, our study indicates that altered  
271 buffering is a potential cause of antagonistic pleiotropy. While we cannot comment on the  
272 genes mediating this phenotypic buffering, our study shows that in different environments,  
273 different genetic loci or their hubs regulate robustness. This along with identification of  
274 environments with high overlap between regulation of mean and robustness support a  
275 scenario where multiple genes are involved in buffering the phenotype and may possibly play  
276 a crucial role in layout of genetic networks.

277  
278 Our variance mapping using biparental recombinant populations adds to the understanding of  
279 fundamental questions like missing heritability (Manolio *et al.* 2009; Eichler *et al.* 2010).  
280 High population dependence and incomplete penetrance impede the identification of disease-  
281 causing alleles (Zuk *et al.* 2012; Mackay 2014). We propose altered phenotypic buffering as a  
282 possible causative mechanism behind missing heritability (Queitsch *et al.* 2012). Effect of a  
283 disease-causing locus will be neutralized in the presence of an allele that buffers the  
284 phenotypic variance, whereas it will be causative in the decanalized allele (Figure 5). While  
285 genome-wide association studies suffer from a lack of power to identify such epistatic  
286 interactions, analyzing the variance of a population along with the mean can act as a robust  
287 refinement to narrow down the possible interactors of disease-causing alleles.

288  
289

## 290 **METHODS**

### 291 **Dataset**

292 The raw growth data analysed in this study was derived from a study by Bloom *et al.* (2013),  
293 in which the experimental procedures are described in detail. The data we used was generated  
294 for 1,008 segregants derived from a cross between *S. cerevisiae* strains BY (a laboratory  
295 strain) and RM11-1a (a wine isolate, indicated as RM). These segregants were grown in 46  
296 different conditions. Of these, we studied 34 conditions (see Table S2, see File S1 for more  
297 information).

298

### 299 **QTL and vQTL mapping**

300 The single environment QTL and two-QTL mapping was carried out as described previously  
301 (Bhatia *et al.* 2014).

302

303 To estimate the difference in phenotypic variance between the two genotypic groups, *i.e.* to  
304 identify vQTL in each environment, the standard Brown-Forsythe (BF) statistic (Lee *et al.*  
305 2014) and the corresponding LOD score were calculated for each genetic marker in each  
306 environment (see File S1). The BF test is equivalent to an F-test performed on the deviations  
307 of the phenotypic values from their respective genotypic medians (or the means). Hence,  
308 under the alternative hypothesis, the phenotypes of the two alleles reveal a difference in the  
309 variance. As a result, the corresponding LOD scores indicate markers responsible for genetic  
310 canalization defined as variance-QTL (vQTL).

311

312 At a particular marker, let  $z_{ij}$  be the absolute deviation of segregant  $i$ 's phenotypic value  $y_{ij}$   
313 from its genotypic mean  $\tilde{y}_j$  where  $j$  can take two values ( $j=1$ : BY allele and  $j=2$ : RM  
314 allele).

315

$$z_{ij} = |y_{ij} - \tilde{y}_j|$$

316

317 Then BF statistic for that marker can be computed as follows:

318

$$F = \frac{(N-p) \sum_{j=1}^p n_j (\tilde{z}_{..j} - \tilde{z}_{..})^2}{(p-1) \sum_{j=1}^p \sum_{i=1}^{n_j} (z_{ij} - \tilde{z}_{.j})^2}$$

319

320 Here,  $N$  is the total number of segregants,  $n_1$  and  $n_2$  are the number of segregants having  
321 the BY and RM allele respectively ( $p = 2$ ). In order to estimate the effects of vQTL in the  
322 same order as in QTL, LOD scores were computed as described previously (Broman and Sen  
323 2009).

324  
325 To establish the statistical significance of the putative QTL and vQTL, P-values were  
326 computed using a genome-wide permutation test of 1,000 permutations, where the null  
327 distribution consisted of the highest genome-wide LOD score obtained from each  
328 permutation. A LOD cut off of 3.0 and a P-value cut off of 0.01 was considered.

329  
330 To estimate pleiotropy, we divided the genome into 20kb non-overlapping bins (Table S1).  
331 Bins containing two or more QTL or vQTL significant (P-value < 0.01) in different  
332 environments were considered as pleiotropic bins. The first markers of each of these  
333 pleiotropic bins, used as representative of the bins were collated to represent the set of  
334 pleiotropic markers (Table S1, S2).

335  
336 Apart from the standard two-QTL mapping described previously (Bhatia *et al.* 2014), we  
337 mapped variance-controlled interactions, *i.e.* a two-vQTL interaction, which occurs when the  
338 phenotypic variance at one locus depends on the genotype at another locus. To increase  
339 power to identify two-QTL and two-vQTL interactions, for environment specific, targeted  
340 multi-QTL mapping, genetic loci significant in either QTL or vQTL or both mappings were  
341 collated for each environment (Table S2). Additionally the size of the bin was increased from  
342 20kb to 50kb for the same. This collated set of environment-specific loci was tested for both,  
343 two-QTL and two-vQTL interactions in their respective environments. A total of 47 two-  
344 QTL interactions each significant (P-value < 0.001) in at least one of the 34 environments  
345 were obtained. The P-values were computed using a permutation test of 10,000 permutations  
346 with the phenotype data shuffled relative to the genotype data.

347

#### 348 **Covariance across environmental pairs**

349 To assess the differential covariance of a locus across multiple environments, we considered  
350 the collated set of pleiotropic markers for our study (Table S3). To quantify the differential  
351 covariance across a pair of environments, a Deming regression was calculated between the  
352 phenotype values of the chosen pair of environments for each allele, using R package ‘mcr’.

353 Deming regression, which minimizes errors in multiple dimensions simultaneously, served as  
354 a suitable measurement error model for assessing buffering across two or more environments.  
355 For every possible environment pair, a t-test was performed between the deviations of the  
356 phenotypic values from the Deming fit of the BY and RM allele (P-value < 0.05).

357

358

### 359 **ACKNOWLEDGEMENTS**

360 We thank Gyan Bhanot for critical reading of the manuscript. This research was supported by  
361 Tata Institute of Fundamental Research intramural funds (HS). The funders had no role in  
362 study design, data collection and analysis, decision to publish, or preparation of the  
363 manuscript.

364

365

### 366 **AUTHOR CONTRIBUTIONS**

367 Conceived and designed analysis: AY HS. Analysed data: KD AY HS. Wrote the paper: AY  
368 HS.

369

370

### 371 **FIGURE LEGENDS**

#### 372 **Figure 1: QTL and vQTL**

373 (A) Schematic showing three categories of QTL mapped. QTL has significantly different  
374 allelic mean but non-significant different allelic variance; vQTL has non-significant mean  
375 difference but significantly different variance; QTL+vQTL has both significant different  
376 allelic mean and variance.

377 (B) Distribution of QTL mapped in each environment as QTL (red), vQTL (blue) and  
378 QTL+vQTL (black) in the segregating population. The y-axis is proportion of QTL in each  
379 category (see Results). The x-axis is arranged by increasing proportion of QTL and the left  
380 group has the highest proportion of QTL + vQTL. See Table S2 for details.

381 (C) Total distribution of QTL mapped across 34 environments as QTL (red), vQTL (blue)  
382 and QTL+vQTL (black) in the segregating population.

383

#### 384 **Figure 2: Directionality of alleles in QTL+vQTL category**

385 (A) Representative frequency distributions of three QTL markers showing directionality of  
386 variance release. Blue distribution is of segregants with BY allele and red is for RM

387 segregants. 4NQO [chrXII (207,340)] marker shows a negative release of variance of BY  
388 allele (with RM mean > BY mean); Lactose [chrXIV (376,315)] marker shows equal variance  
389 of the two alleles; MgSO<sub>4</sub> [chrVII (187,538)] marker shows a positive release of variance of  
390 BY allele (with RM mean < BY mean). The QTL are indicated as chromosome number  
391 followed by marker position in bp within brackets. Color bar on the top of each distribution  
392 represents the three classes of correlations between mean and variance.

393 (B) Correlation between mean and variance of all QTL in each environment. Correlations less  
394 than -0.5 (red) represent environments that have a negative release of variance of BY allele.  
395 Correlations more than +0.5 (yellow) represent environments that have a positive release of  
396 variance of BY allele. Environments with no directional release of variance (correlations  
397 between  $\pm 0.5$ ) are represented as blue. The y-axis is correlation between mean and variance;  
398 dashed lines show  $\pm 0.5$  correlation value.

399

### 400 **Figure 3: Representative covariance and two-QTL interactions**

401 (A) Covariance of normalized growth phenotype of BY (blue) and RM (red) segregants for  
402 chrXIV (368,185) marker in 4-HBA and Galactose. Mean and variance of each allele in each  
403 environment is indicated in the box.

404 (B) Two-QTL interaction between chrXIV (368,185)-chrXIII (46,758) in 4-HBA.

405 (C) Two-QTL interaction between chrXIV (368,165)-chrXV (555,452) in Galactose.

406 (D) Covariance of normalized growth phenotype of BY (blue) and RM (red) segregants for  
407 chrXII (649,260) marker in MgSO<sub>4</sub> and Cu (copper). Mean and variance of each allele in  
408 each environment is indicated in the box.

409 (E) Two-QTL interaction between chrXII (649,260)-chrVII (187,538) in MgSO<sub>4</sub>.

410 (F) Two-QTL interaction between chrXII (649,260)-chrVIII (208,560) in Cu.

411 The QTL is indicated as a chromosome number followed by the marker position in bp within  
412 brackets (a convention followed in all QTL plots). For (A, D), the axes are normalized  
413 growth of segregants in the two environments indicated. For (B, C, E, F), the x-axis is  
414 normalized growth of segregants in the environment and the y-axis is number of segregants.  
415 Dash lines in segregant distributions indicate the means of the distributions. The biallelic  
416 marker segregant distributions (in the QTL marker order written above the plots) are  
417 indicated as BB (light blue), BR (light brown), RB (dark green) and RR (purple). Inset plots  
418 show the average distributions of the first marker (BY (blue) and RM (red) alleles). See Table  
419 S3, S4 for details.

420

421 **Figure 4: Two-QTL and two-vQTL interactions**

422 (A) Two-QTL and two-vQTL interactions between various markers shown as connected  
423 links. The chrII (245,879) marker (red) has multiple two-QTL interactions (deep red) for  
424 growth in same environment (Congo red). The chrXIV (466,590) marker (green) has 6  
425 environment-specific two-QTL interactions (4NQO= dark green, Formamide= deep purple,  
426 IAA= light blue, Lithium chloride= deep orange, Trehalose= deep yellow, Xylose= orange).  
427 Other two-QTL interactions are indicated as light grey links.

428 (B) All two-QTL (red), two-vQTL (blue) and two-QTL+vQTL (black) interactions across all  
429 environments.

430 The figures were made using Circos (Krzyszowski *et al.* 2009). See Table S4 for data.

431 (C) Scatter plots showing examples of two-QTL interactions of four markers [chrIII  
432 (191,928), chrIV (997,621), chrVIII (101,016), chrXIV (466,105)] in Indoleacetic acid. The  
433 biallelic marker segregant distributions (in the QTL marker order written above the plots) are  
434 indicated as BB (red), BR (yellow), RB (green) and RR (blue) on x-axis. Mean and variance  
435 of each allelic pair is indicated in the box with allelic pair with most variance indicated in red.  
436 The y-axis is normalized growth phenotype.

437 (D) Schematic representation of network of four loci (indicated in (C) above) maintaining  
438 phenotypic robustness in Indoleacetic acid.

439

440 **Figure 5: A schematic showing environment and genetic background dependent loss of**  
441 **buffering**

442 A regulator (red node) of robustness buffers genetic variability (blue nodes), which results in  
443 a robust population phenotype. This buffering is lost in either a differential allele (green  
444 node) of the regulator or a novel environment (red distribution), thus releasing cryptic genetic  
445 variability (yellow node), which in favourable cases results in better adaptation in the novel  
446 environment, or in unfavourable cases manifests as a detrimental phenotype or a disease.

447

448

449 **SUPPORTING INFORMATION**

450 **File S1:** Scripts and datasets for QTL, vQTL, and two-QTL, two-vQTL interaction mapping.

451

452 **Table S1:** Classification of chromosomal markers into bins.

453 **Table S2:** List of markers significant for QTL and vQTL mapping. F and BF statistics along  
454 with their P-values along with the categorization as only vQTL, only QTL and both.

455 **Table S3:** Covariance analysis of selected bins. T-test of Deming regression between the two  
456 alleles across environmental pairs along with its mean and variance for each allele, mean and  
457 variance of each allele independently in both environments.

458 **Table S4:** List of markers significant for two-QTL and two-vQTL mapping.

459

460 **Figure S1:** Covariance of normalized growth phenotype of BY (red) and RM (blue) allele  
461 chrXIII (45,801) marker in Paraquat and Copper. Mean and variance of each allele in each  
462 environment is indicated in the box.

463

464

## 465 REFERENCES

466 Bhatia A., Yadav A., Gagneur J., Zhu C., Steinmetz L. M., Bhanot G., Sinha H., 2014 Yeast  
467 Growth Plasticity Is Regulated by Environment-Specific Multi-QTL Interactions. *G3*  
468 (Bethesda) **4**: 769–777.

469 Bloom J. S., Ehrenreich I. M., Loo W. T., Lite T.-L. V., Kruglyak L., 2013 Finding the  
470 sources of missing heritability in a yeast cross. *Nature* **494**: 234–237.

471 Broman K. W., Sen S., 2009 *A Guide to QTL Mapping with R/qtI*. Springer, New York.

472 Carlborg O., Jacobsson L., Ahgren P., Siegel P., Andersson L., 2006 Epistasis and the release  
473 of genetic variation during long-term selection. *Nat Genet* **38**: 418–420.

474 Chevin L.-M., Lande R., Mace G. M., 2010 Adaptation, Plasticity, and Extinction in a  
475 Changing Environment: Towards a Predictive Theory (JG Kingsolver, Ed.). *PLoS Biol* **8**:  
476 e1000357.

477 Costanzo M., Baryshnikova A., Bellay J., Kim Y., Spear E. D., Sevier C. S., Ding H., Koh J.  
478 L. Y., Toufighi K., Mostafavi S., Prinz J., St Onge R. P., VanderSluis B., Makhnevych  
479 T., Vizeacoumar F. J., Alizadeh S., Bahr S., Brost R. L., Chen Y., Cokol M., Deshpande  
480 R., Li Z., Lin Z.-Y., Liang W., Marback M., Paw J., San Luis B.-J., Shuteriqi E., Tong A.  
481 H. Y., van Dyk N., Wallace I. M., Whitney J. A., Weirauch M. T., Zhong G., Zhu H.,  
482 Houry W. A., Brudno M., Ragibzadeh S., Papp B., Pal C., Roth F. P., Giaever G.,  
483 Nislow C., Troyanskaya O. G., Bussey H., Bader G. D., Gingras A.-C., Morris Q. D.,  
484 Kim P. M., Kaiser C. A., Myers C. L., Andrews B. J., Boone C., 2010 The genetic  
485 landscape of a cell. *Science (New York, NY)* **327**: 425–431.

486 Eichler E. E., Flint J., Gibson G., Kong A., Leal S. M., Moore J. H., Nadeau J. H., 2010  
487 Missing heritability and strategies for finding the underlying causes of complex disease.  
488 *Nat Rev Genet* **11**: 446–450.

489 Félix M.-A., Barkoulas M., 2015 Pervasive robustness in biological systems. *Nat Rev Genet*  
490 **16**: 483–496.

491 Geiler-Samerotte K. A., Bauer C. R., Li S., Ziv N., Gresham D., Siegal M. L., 2013 The  
492 details in the distributions: why and how to study phenotypic variability. *Curr Opin*

- 493 Biotechnol **24**: 752–759.
- 494 Gibson G., Dworkin I., 2004 Uncovering cryptic genetic variation. Nat Rev Genet **5**: 681–  
495 690.
- 496 Haber A., Dworkin I., 2015 *Dis-integrating the fly: A mutational perspective on phenotypic*  
497 *integration and covariation*. Cold Spring Harbor Labs Journals.
- 498 Hall M. C., Dworkin I., Ungerer M. C., Purugganan M., 2007 Genetics of  
499 microenvironmental canalization in *Arabidopsis thaliana*. Proc Natl Acad Sci U S A **104**:  
500 13717–13722.
- 501 Hartman J. L., Garvik B., Hartwell L., 2001 Principles for the buffering of genetic variation.  
502 Science (New York, NY) **291**: 1001–1004.
- 503 Hayden E. J., Bendixsen D. P., Wagner A., 2015 Intramolecular phenotypic capacitance in a  
504 modular RNA molecule. Proc Natl Acad Sci USA **112**: 12444–12449.
- 505 Jamniczky H. A., Boughner J. C., Rolian C., Gonzalez P. N., Powell C. D., Schmidt E. J.,  
506 Parsons T. E., Bookstein F. L., Hallgrímsson B., 2010 Rediscovering Waddington in the  
507 post-genomic age. Bioessays **32**: 553–558.
- 508 Kafri R., Springer M., Pilpel Y., 2009 Genetic Redundancy: New Tricks for Old Genes.  
509 CELL **136**: 389–392.
- 510 Krzywinski M. I., Schein J. E., Birol I., Connors J., Gascoyne R., Horsman D., Jones S. J.,  
511 Marra M. A., 2009 Circos: An information aesthetic for comparative genomics. Genome  
512 Res **19**: 1639–1645.
- 513 Landry C. R., Rifkin S. A., 2010 Chromatin regulators shape the genotype&ndash;phenotype  
514 map. Mol Syst Biol **6**: 1–2.
- 515 Le Rouzic A., Carlborg O., 2008 Evolutionary potential of hidden genetic variation. Trends  
516 in Ecology & Evolution **23**: 33–37.
- 517 Lee C.-R., Anderson J. T., Mitchell-Olds T., 2014 Unifying Genetic Canalization, Genetic  
518 Constraint, and Genotype-by-Environment Interaction: QTL by Genomic Background by  
519 Environment Interaction of Flowering Time in *Boechera stricta* (K Bomblies, Ed.). PLoS  
520 Genet **10**: e1004727.
- 521 Lempe J., Lachowiec J., Sullivan A. M., Queitsch C., 2013 Molecular mechanisms of  
522 robustness in plants. Current Opinion in Plant Biology **16**: 62–69.
- 523 Levy S., Siegal M., 2008 Network Hubs Buffer Environmental Variation in *Saccharomyces*  
524 *cerevisiae* (A Levchenko, Ed.). PLoS Biol **6**: e264.
- 525 Li J., Yuan Z., Zhang Z., 2010 The cellular robustness by genetic redundancy in budding  
526 yeast (J Zhang, Ed.). PLoS Genet **6**: e1001187.
- 527 Mackay T. F. C., 2014 Epistasis and quantitative traits: using model organisms to study gene-  
528 gene interactions. Nat Rev Genet **15**: 22–33.



- 529 Manolio T. A., Collins F. S., Cox N. J., Goldstein D. B., Hindorff L. A., Hunter D. J.,  
530 McCarthy M. I., Ramos E. M., Cardon L. R., Chakravarti A., Cho J. H., Guttmacher A.  
531 E., Kong A., Kruglyak L., Mardis E., Rotimi C. N., Slatkin M., Valle D., Whittemore A.  
532 S., Boehnke M., Clark A. G., Eichler E. E., Gibson G., Haines J. L., Mackay T. F. C.,  
533 Mccarroll S. A., Visscher P. M., 2009 Finding the missing heritability of complex  
534 diseases. *Nature* **461**: 747–753.
- 535 Masel J., 2013 Q&A: Evolutionary capacitance. *BMC Biology* **11**: 103.
- 536 Masel J., Siegal M. L., 2009 Robustness: mechanisms and consequences. *Trends Genet* **25**:  
537 395–403.
- 538 McGuigan K., Sgrò C. M., 2009 Evolutionary consequences of cryptic genetic variation.  
539 *Trends in Ecology & Evolution* **24**: 305–311.
- 540 Paaby A. B., Rockman M. V., 2014 Cryptic genetic variation: evolution’s hidden substrate.  
541 *Nat Rev Genet* **15**: 247–258.
- 542 Queitsch C., Carlson K. D., Girirajan S., 2012 Lessons from Model Organisms: Phenotypic  
543 Robustness and Missing Heritability in Complex Disease (SM Rosenberg, Ed.). *PLoS*  
544 *Genet* **8**: e1003041.
- 545 Queitsch C., Sangster T. A., Lindquist S., 2002 Hsp90 as a capacitor of phenotypic variation.  
546 *Nature* **417**: 618–624.
- 547 Rutherford S. L., Lindquist S., 1998 Hsp90 as a capacitor for morphological evolution.  
548 *Nature* **396**: 336–342.
- 549 Sangster T., Salathia N., Undurraga S., Milo R., Schellenberg K., Lindquist S., Queitsch C.,  
550 2008 HSP90 affects the expression of genetic variation and developmental stability in  
551 quantitative traits. *Proc Natl Acad Sci USA* **105**: –2968.
- 552 Siegal M. L., Leu J.-Y., 2014 On the Nature and Evolutionary Impact of Phenotypic  
553 Robustness Mechanisms. *Annu. Rev. Ecol. Evol. Syst.* **45**: 495–517.
- 554 Taute K. M., Gude S., Nghe P., Tans S. J., 2014 Evolutionary constraints in variable  
555 environments, from proteins to networks. *Trends Genet* **30**: 192–198.
- 556 Taylor M. B., Ehrenreich I. M., 2015 Transcriptional Derepression Uncovers Cryptic Higher-  
557 Order Genetic Interactions. (P Wittkopp, Ed.). *PLoS Genet* **11**: e1005606.
- 558 Tirosh I., Reikhav S., Sigal N., Assia Y., Barkai N., 2010 Chromatin regulators as capacitors  
559 of interspecies variations in gene expression. *Mol Syst Biol* **6**: 435.
- 560 Vidal M., Cusick M. E., Barabási A.-L., 2011 Interactome networks and human disease.  
561 *CELL* **144**: 986–998.
- 562 Wagner G. P., Pavlicev M., Cheverud J. M., 2007 The road to modularity. *Nat Rev Genet* **8**:  
563 921–931.
- 564 Yadav A., Radhakrishnan A., Bhanot G., Sinha H., 2015 Differential Regulation of  
565 Antagonistic Pleiotropy in Synthetic and Natural Populations Suggests Its Role in

566           Adaptation. *G3* (Bethesda) **5**: 699–709.

567   Zuk O., Hechter E., Sunyaev S. R., Lander E. S., 2012 The mystery of missing heritability:  
568   Genetic interactions create phantom heritability. *Proc Natl Acad Sci USA* **109**: 1193–  
569   1198.

570

# Figure 1

## A

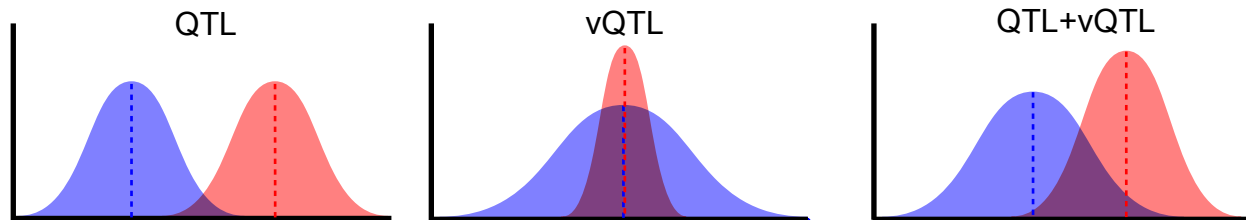

## B

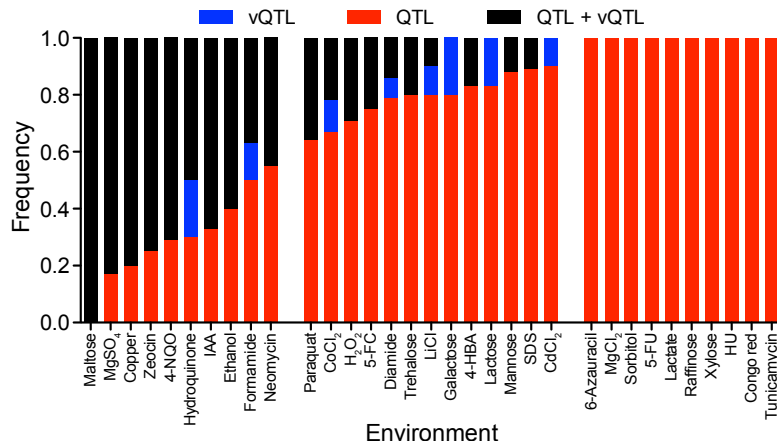

## C

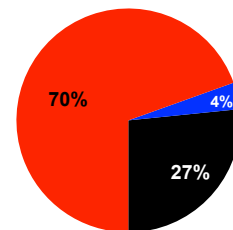

**Figure 2****A**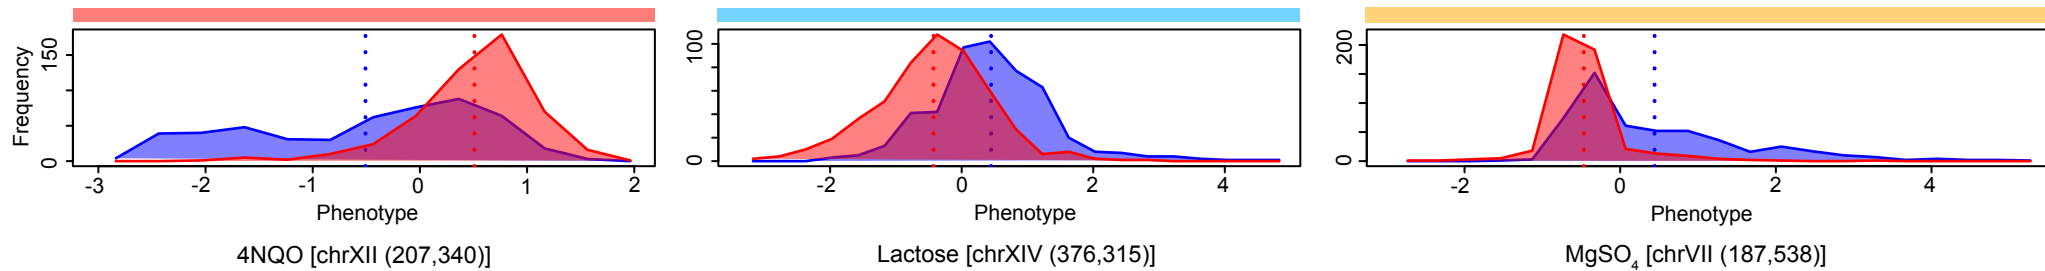**B**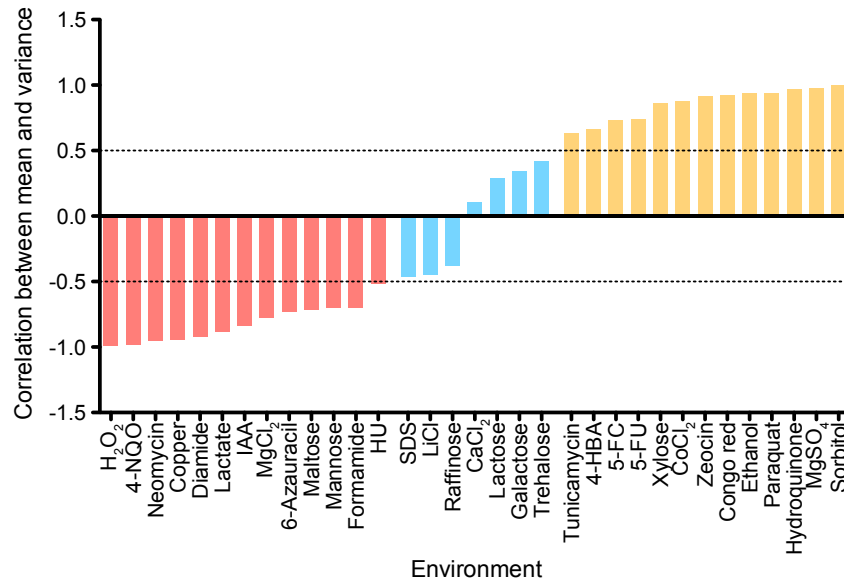

**Figure 3**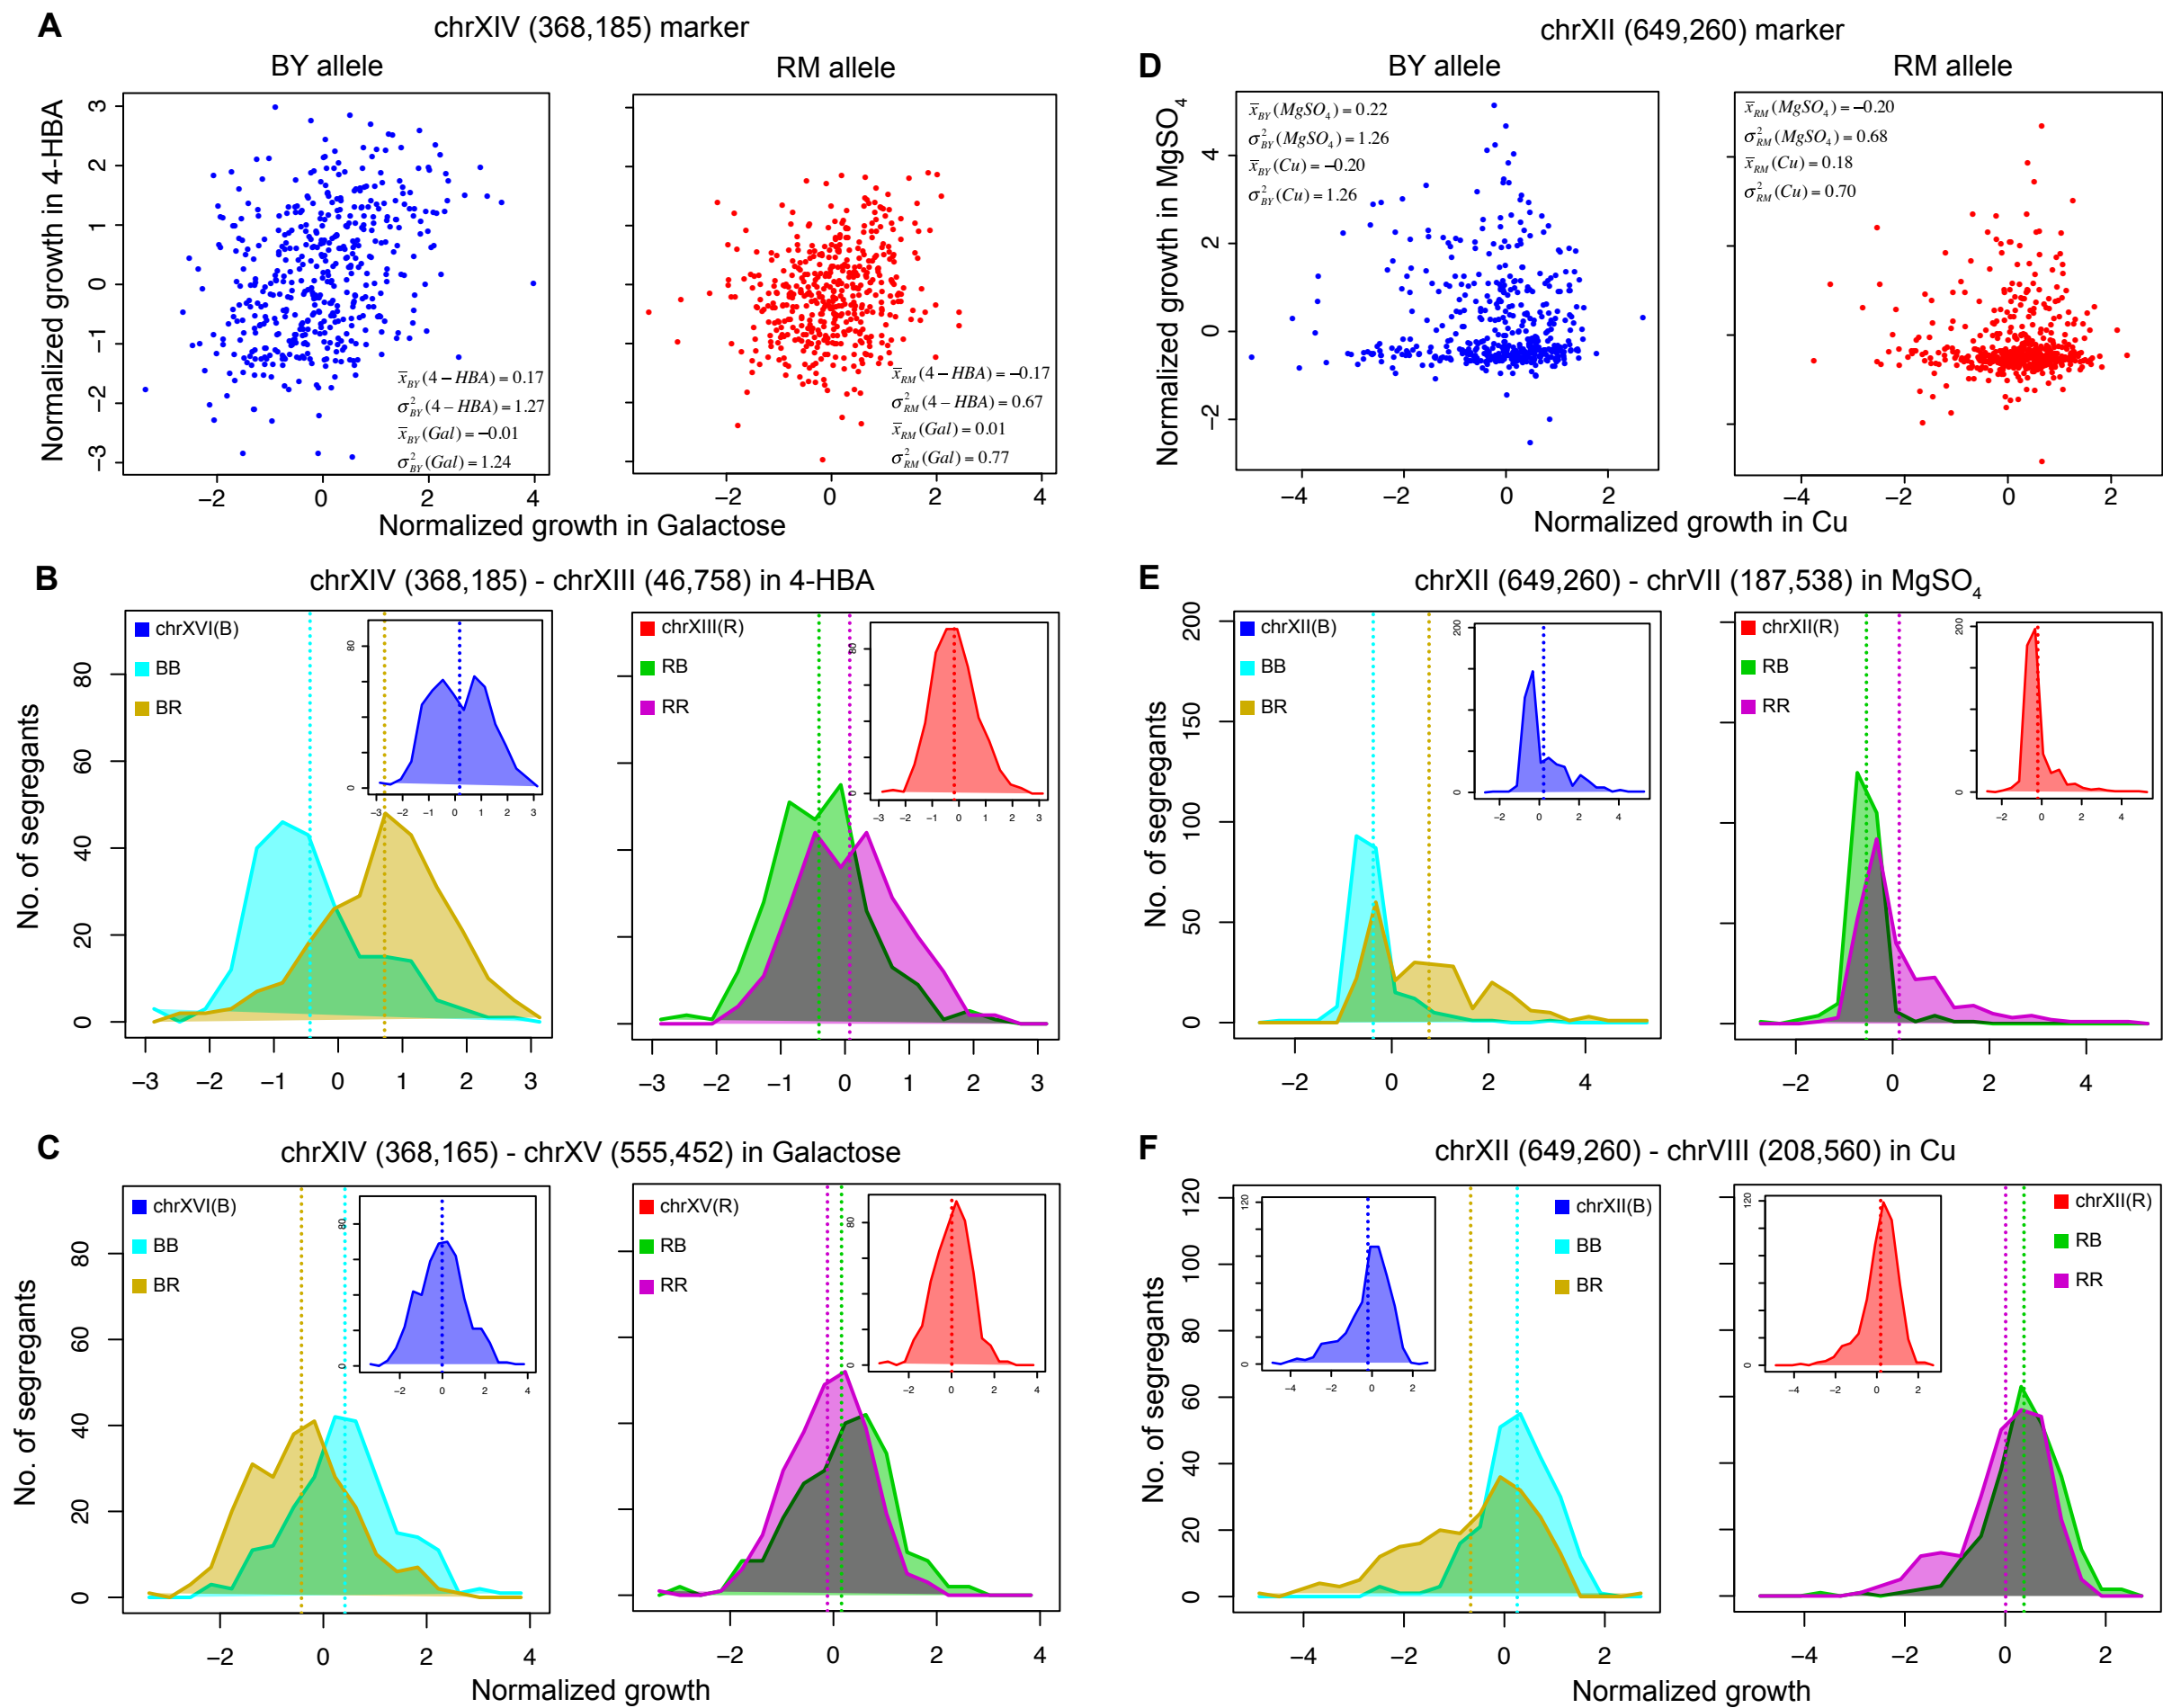

Figure 4

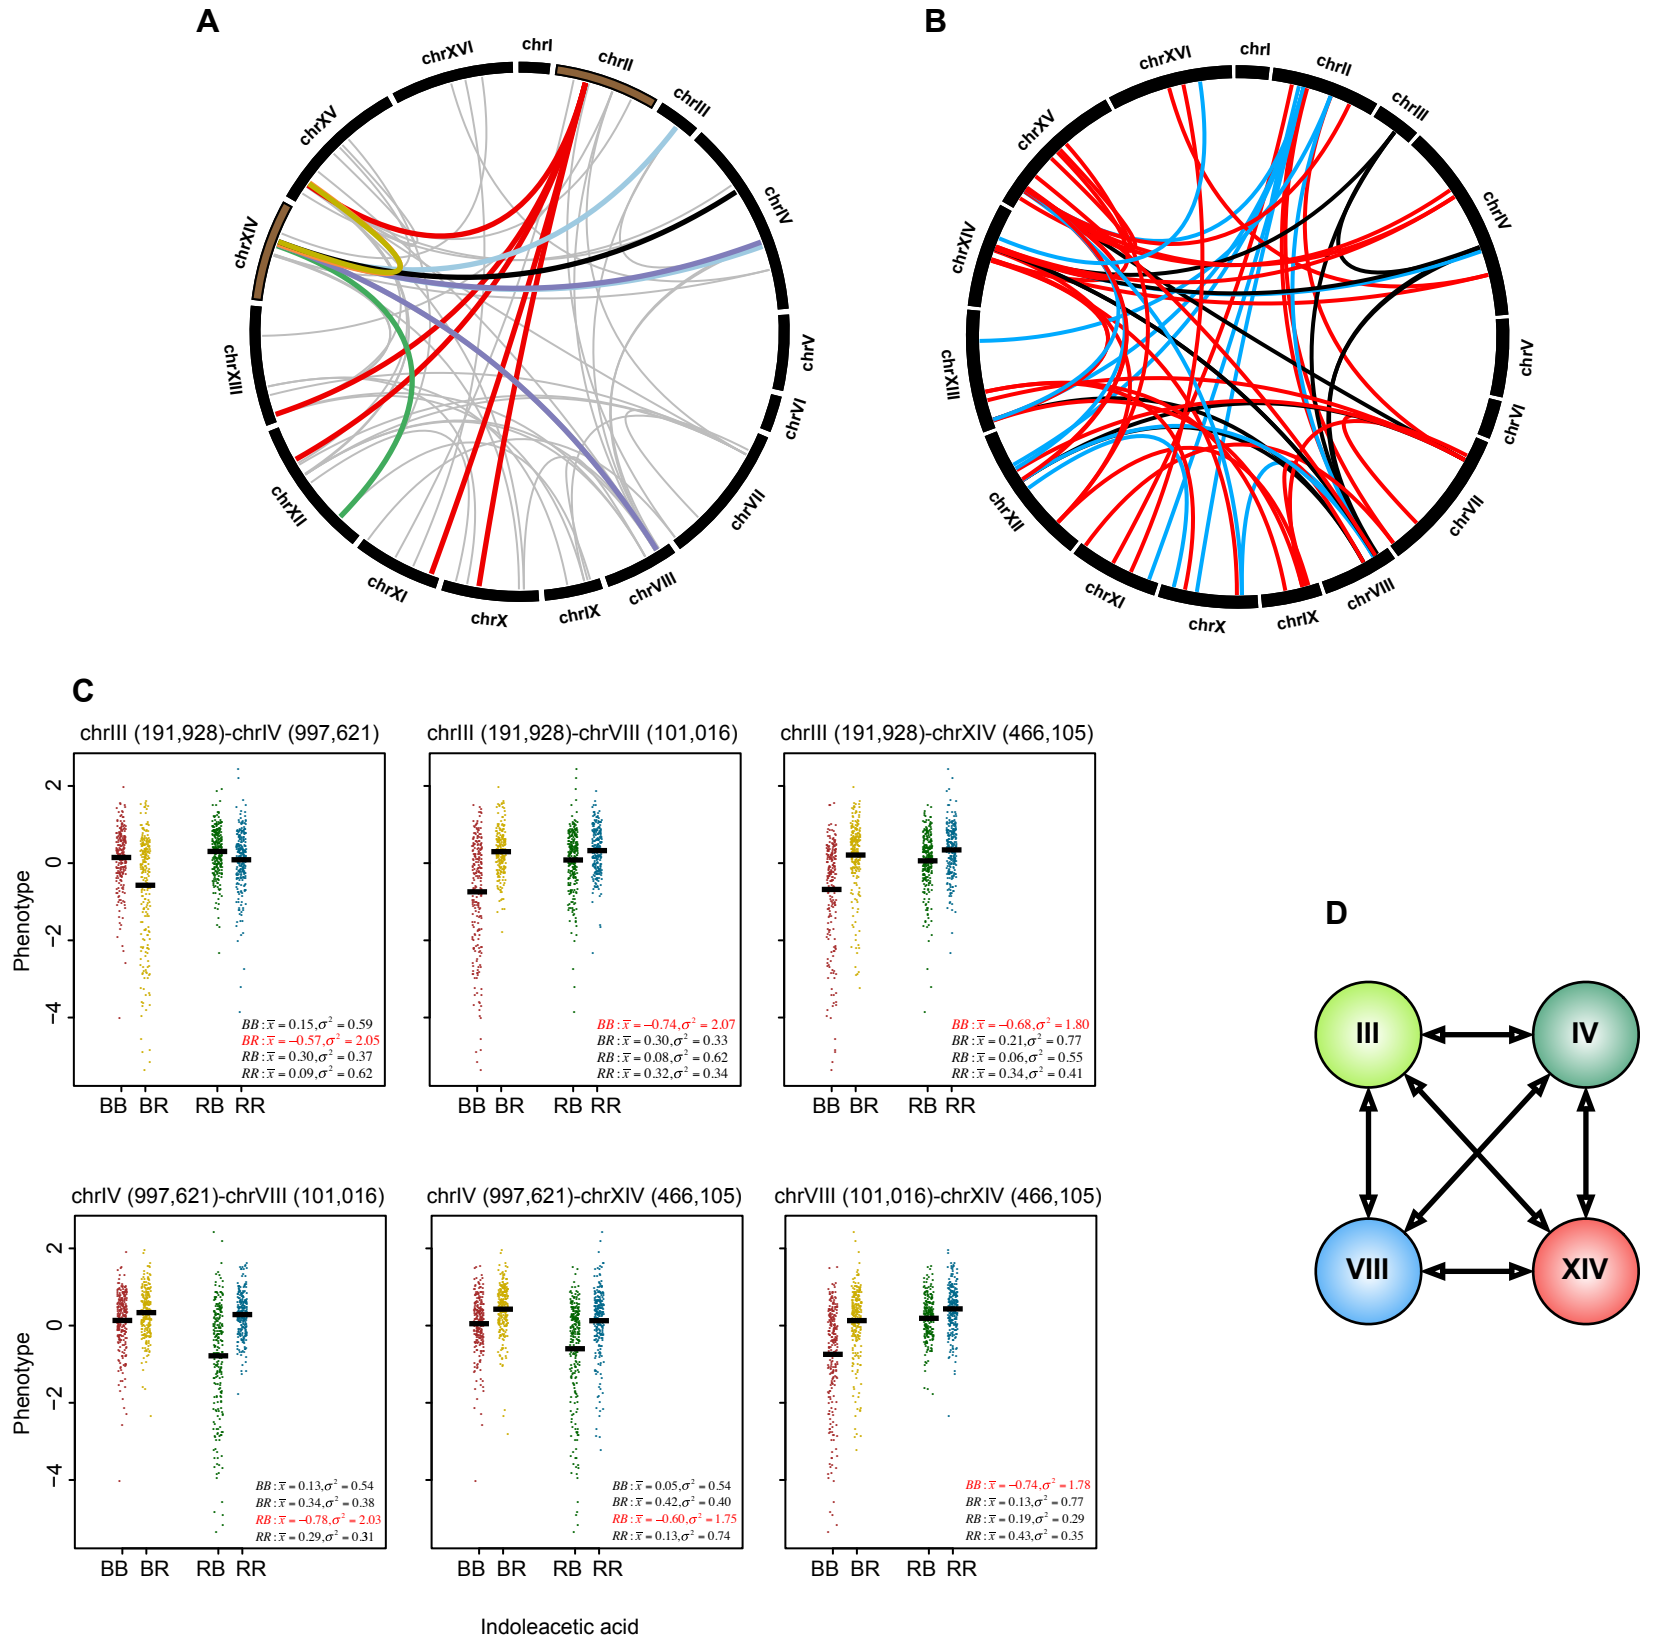

**Figure 5**

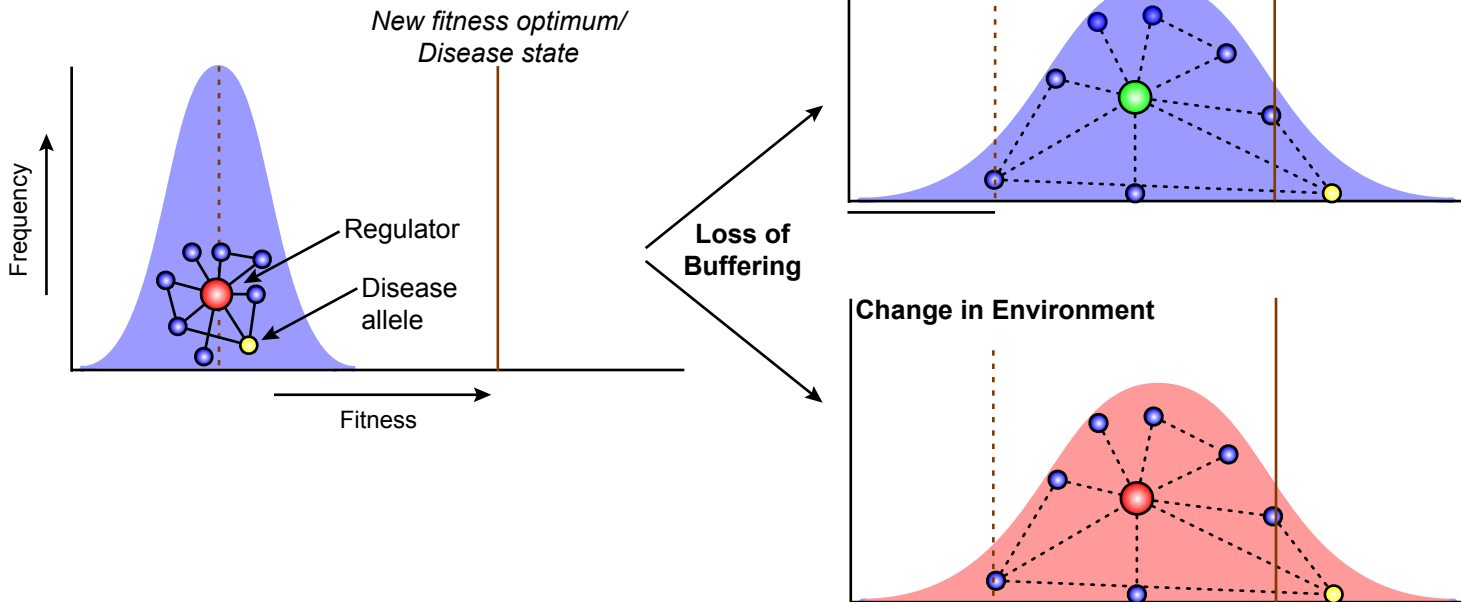

Figure S1

chrXIII (45,801) marker

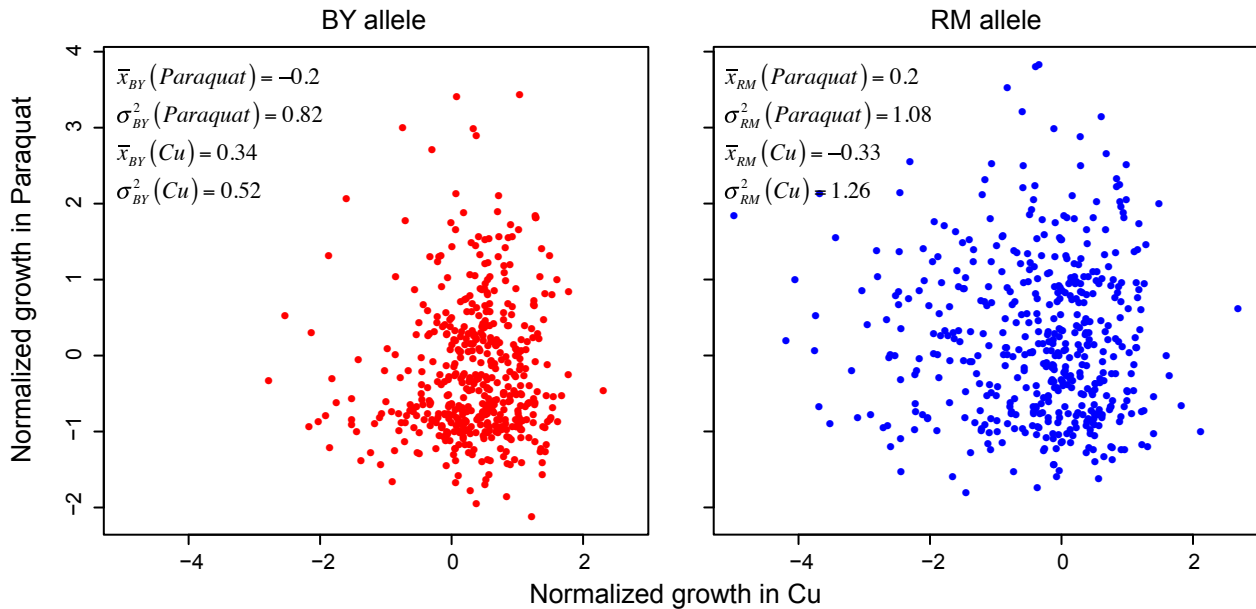

Source: https://www.biorxiv.org/content/10.1101/033621v1.full.pdf
